# Supplementary material for: Applications Analyses, Challenges and Development of Augmented Reality in Education, Industry, Marketing, Medicine, and Entertainment
Source: MDPI journal article supplement (doi:10.3390/app13052766), 2023-02-21
Supplement: s1 [file s1]

## Supplementary Materials

Table S1. Summary of AR literature review.

| AR Review of Literature Articles                                                                                       | Sections Developed in the Article                                                                                                                                                                                                                                                                                                                                     | Periods Taken for AR Study          | Purpose of the Paper                                                                                                                                                                                                          | Mentioned Areas Where AR is Implemented                                                      |
|------------------------------------------------------------------------------------------------------------------------|-----------------------------------------------------------------------------------------------------------------------------------------------------------------------------------------------------------------------------------------------------------------------------------------------------------------------------------------------------------------------|-------------------------------------|-------------------------------------------------------------------------------------------------------------------------------------------------------------------------------------------------------------------------------|----------------------------------------------------------------------------------------------|
| Augmented Reality: A Review                                                                                            | History of augmented reality, what is augmented reality? How Augmented Reality Systems Work?, Current uses of Augment Reality, Challenges for Augmented Reality, and Implications for libraries.                                                                                                                                                                      | AR reviewed until 2009              | Describing a summary of AR to talk about what it is, how it functions, its recent applications, and its possible effect on libraries.                                                                                         | Marketing, entertainment, sightseeing, industry, fashion, and medicine. (Slightly described) |
| A Survey of Augmented Reality                                                                                          | Introduction, Definition and Taxonomy, History, AR tracking Technology, AR Display Technology, AR Development Tools, AR Input and Interaction Technologies, Design Guidelines, and Interface Patterns, Evaluation of AR systems, AR Applications Today, Research Directions, and Conclusions.                                                                         | From 1963 to the present day (2015) | A summary of key AR technologies such as Tracking, Display, and Input Devices. It also mentions development tools, interaction Design methods and evaluation Techniques and finally, favorable directions for AR future work. | Education, Architecture, and Marketing                                                       |
| A systematic review of Augmented Reality content-related techniques for knowledge transfer in maintenance applications | Introduction, Methodology, Analysis, Results, Discussions, Conclusions, and Future Works.                                                                                                                                                                                                                                                                             | 2012 to 2017                        | To identify AR's potential for knowledge transfer in the context of maintenance applications.                                                                                                                                 | Industrial Maintenance                                                                       |
| A review of using Augmented Reality in Education from 2011 to 2016                                                     | Introduction, Method, Results, and discussion (Number of papers published, Number of Journal Publications in this review, Major contributing countries in this review, Sample groups in this review, Research field in this review, Research methods and design in this review), Effectiveness of using AR in this review, Trends and future vision, and Conclusions. | From 2011 to 2016                   | It describes a study of literature on AR in educational contexts contemplating the uses, benefits, characteristics, and efficacy of AR in educational settings.                                                               | Education                                                                                    |
| Augmented Reality: an overview                                                                                         | Introduction, history, AR technologies, AR Mobile Systems, Applications, Future for AR Applications, iPhone Projects: AR (Ideas).                                                                                                                                                                                                                                     | From 1950s to 2011                  | It gives a wide summary of the main concepts of AR, its recent systems, and applications. It provides a guide for recent, ongoing AR investigations, and                                                                      | Advertising and commercial, entertainment and education, medical applications,               |

|                                                                                                                                                                         |                                                                                                                                                                                                                                                   |  |                                                                                                                                                                                                                                                                                                                                                                                                                 |                               |
|-------------------------------------------------------------------------------------------------------------------------------------------------------------------------|---------------------------------------------------------------------------------------------------------------------------------------------------------------------------------------------------------------------------------------------------|--|-----------------------------------------------------------------------------------------------------------------------------------------------------------------------------------------------------------------------------------------------------------------------------------------------------------------------------------------------------------------------------------------------------------------|-------------------------------|
| Application<br>Analyses,<br>challenges,<br>and<br>development<br>of Augmented<br>Reality in<br>entertainment,<br>medicine,<br>marketing,<br>industry, and<br>education. |                                                                                                                                                                                                                                                   |  | estimates potential ideas for AR implemented in iPhone.                                                                                                                                                                                                                                                                                                                                                         | Mobile (iPhone) applications, |
|                                                                                                                                                                         | Introduction, Materials, and Methods, Results (Education, Marketing, Industry, Medicine, Entertainment), From 2017 to the present day (2023) Discussions of the results, Conclusions, and Recommendations for future AR research implementations. |  | It provides an examination of AR applications in articles selected from 2017 to 2021 finding coincidences in current AR uses, important obstacles, challenges, problems, and benefits that are necessary to consider for future application of this technology in the areas of education, marketing, industry, medicine, and entertainment. It includes recommendations for future AR research implementations. |                               |

**Table S2.** Titles selected for AR study in education.

| Education                                                                                                        |                                                                                              |                                                                                                             |                                                                                                                     |                                                                                        |
|------------------------------------------------------------------------------------------------------------------|----------------------------------------------------------------------------------------------|-------------------------------------------------------------------------------------------------------------|---------------------------------------------------------------------------------------------------------------------|----------------------------------------------------------------------------------------|
| IEEE Xplore                                                                                                      | Science Direct                                                                               | Google Academic                                                                                             | Taylor & Francis                                                                                                    | Springer                                                                               |
| Augmented Reality and Virtual Reality for Learning: An Examination Using an Extended Technology Acceptance Model | Improving stroke education with augmented reality: A randomized control trial                | The Impact of an Augmented Reality Application on the Learning Motivation of Students                       | Interaction analysis of teachers and students in inquiry class learning based on augmented reality by iFIAS and LSA | Improving the Learning of Mechanics Through Augmented Reality                          |
| Knowing Your Student: Targeted Teaching Decision Support Through Asymmetric Mixed Reality Collaborative Learning | Virtual and augmented reality for the biological microscope in experiment education          | Application of augmented reality technologies for the preparation of specialists of a new technological era | Augmented reality sandboxes: children's play and storytelling with mirror worlds                                    | Evaluation of the ARTutor augmented reality educational platform in tertiary education |
| Adoption of Virtual and Augmented Reality for Mathematics Education: A Scoping Review                            | Augmented reality for the hands-on studying of the human body for elementary school students |                                                                                                             |                                                                                                                     |                                                                                        |

**Table S3.** Titles selected for AR study in industry.

| Industry                                                                                              |                                                                                                      |                                                                                                                              |                                                                                    |                                                                                                                                      |
|-------------------------------------------------------------------------------------------------------|------------------------------------------------------------------------------------------------------|------------------------------------------------------------------------------------------------------------------------------|------------------------------------------------------------------------------------|--------------------------------------------------------------------------------------------------------------------------------------|
| IEEE Xplore                                                                                           | Science Direct                                                                                       | Google Academic                                                                                                              | Taylor & Francis                                                                   | Springer                                                                                                                             |
| A Practical Evaluation of Commercial Industrial Augmented Reality Systems in an Industry 4.0 Shipyard | Food 4.0: Implementation of the Augmented Reality Systems in the Food Industry                       | Maintenance in aeronautics in an Industry 4.0 context: The role of augmented reality and additive manufacturing              | Disassembly sequence planning validated thru augmented reality for a speed reducer | The efficient integration process of production data into Augmented Reality based maintenance of machine tools                       |
| A Review on Industrial Augmented Reality Systems for the Industry 4.0 Shipyard                        | Creating an Open-Source Augmented Reality Remote Support Tool for Industry: Challenges and Learnings | Technology acceptance model for augmented reality and building information modeling integration in the construction industry |                                                                                    | Improving AR-powered remote assistance: a new approach aimed to foster operator's autonomy and optimize the use of skilled resources |
|                                                                                                       |                                                                                                      | MARMA: A mobile augmented reality maintenance assistant for fast-track repair procedures in the context of Industry 4.0      |                                                                                    |                                                                                                                                      |
| C.DOT—Convolutional Deep Object Tracker for Augmented Reality Based Purely on Synthetic Data          |                                                                                                      |                                                                                                                              |                                                                                    |                                                                                                                                      |

**Table S4.** Titles selected for AR study in marketing.

| Marketing                                                                               |                                                                                                           |                                                                                            |                  |                                                                                                                                  |
|-----------------------------------------------------------------------------------------|-----------------------------------------------------------------------------------------------------------|--------------------------------------------------------------------------------------------|------------------|----------------------------------------------------------------------------------------------------------------------------------|
| IEEE Xplore                                                                             | Science Direct                                                                                            | Google Academic                                                                            | Taylor & Francis | Springer                                                                                                                         |
| Spatial Augmented Reality-Based Customer Satisfaction Enhancement and Monitoring System | Setting the future of digital and social media marketing research: Perspectives and research propositions | Augmented Reality Marketing: A Technology-Enabled Approach to Situated Customer Experience | Not Found        | Measuring the appeal of mobility-augmented reality games, based on the innovative models of interaction: a case study            |
| E-Marketing via Augmented Reality: A Case Study in the Tourism and Hospitality Industry | Augmented reality is eating the real world! The substitution of physical products for holograms           | Strategic approaches to augmented reality deployment by luxury brands                      | Not Found        | Seeing eye to eye: social augmented reality and shared decision making in the marketplace                                        |
|                                                                                         |                                                                                                           | We Are at home: How augmented reality reshapes mobile marketing and consumer-brand         | Not Found        | Augmenting the eye of the beholder: exploring the strategic potential of augmented reality to enhance online service experiences |
|                                                                                         |                                                                                                           | Beyond the gimmick: How affective responses drive brand attitudes and                      |                  | Marketing research on Mobile apps: past, present and future                                                                      |

intentions in  
augmented reality  
marketing

**Table S5.** Titles selected for AR study in medicine.

| Medicine                                                                                                                |                                                                                                          |                                                                                                                                          |                                                                                           |                                                                                                                                                            |
|-------------------------------------------------------------------------------------------------------------------------|----------------------------------------------------------------------------------------------------------|------------------------------------------------------------------------------------------------------------------------------------------|-------------------------------------------------------------------------------------------|------------------------------------------------------------------------------------------------------------------------------------------------------------|
| IEEE Xplore                                                                                                             | Science Direct                                                                                           | Google Academic                                                                                                                          | Taylor & Francis                                                                          | Springer                                                                                                                                                   |
| Effects of Virtual Reality and Augmented Reality on Induced Anxiety                                                     | Augmented reality-based visual-haptic modeling for thoracoscopic surgery training systems                | Medical Augmented Reality Visualizer for Surgical Training and Education in Medicine                                                     | Toward natural 3D interaction for laparoscopic augmented reality registration             | Patient-specific 3D printed and augmented reality kidney and prostate cancer models: impact on patient education                                           |
| Projected Augmented Reality to Drive Osteotomy Surgery: Implementation and Comparison with Video See-Through Technology | The design choices for the development of an Augmented Reality game for people with visuospatial neglect | Augmented Reality for Guideline Presentation in Medicine: Randomized Crossover Simulation Trial for Technically Assisted Decision making | Influence of sampling accuracy on augmented reality for laparoscopic image-guided surgery | A workflow to generate patient-specific three-dimensional augmented reality models from medical imaging data and example applications in urologic oncology |
|                                                                                                                         | Chapter 4—Augmented reality, virtual reality, and new age technologies demand escalates amid COVID-19    | Providing dementia education with augmented reality: a health sciences and medicine feasibility pilot study                              |                                                                                           |                                                                                                                                                            |

**Table S6.** Titles selected for AR study in entertainment.

| Entertainment                                                                                                    |                                                                                                  |                                                                                                                 |                  |                                                                                                                            |
|------------------------------------------------------------------------------------------------------------------|--------------------------------------------------------------------------------------------------|-----------------------------------------------------------------------------------------------------------------|------------------|----------------------------------------------------------------------------------------------------------------------------|
| IEEE Xplore                                                                                                      | Science Direct                                                                                   | Google Academic                                                                                                 | Taylor & Francis | Springer                                                                                                                   |
| Eye-Contact Game Using Mixed Reality for the Treatment of Children with Attention Deficit Hyperactivity Disorder | Development of augmented reality serious games with a vibrotactile feedback jacket               | EAR: Enhanced Augmented Reality System for Sports Entertainment Applications                                    | Not Found        | Designing and implementing interactive and realistic augmented reality experiences                                         |
| Effectiveness of Kinesthetic Game-Based Training System in Children with Visual-Perceptual Dysfunction           | EmoFindAR: Evaluation of a mobile multiplayer augmented reality game for primary school children | An interactive information system that supports an augmented reality game in the context of game-based learning | Not Found        | Patient-Tailored Augmented Reality Games for Assessing Upper Extremity Motor Impairments in Parkinson's Disease and Stroke |
| Near-contact Person-to-3D Character Dance Training: Comparing AR and VR for Interactive Entertainment            |                                                                                                  |                                                                                                                 |                  |                                                                                                                            |
| Effects of gamified augmented reality in public spaces                                                           |                                                                                                  |                                                                                                                 |                  |                                                                                                                            |
